# Supplementary material for: Analytical model captures intratidal variation of salinity in aconvergent, well-mixed estuary
Source: Copernicus journal article supplement (doi:10.5194/hess-2019-256), 2019-06-03
Supplement: Supplementary file [file hess-2019-256-AC3-supplement.pdf]

Dear Editor,

We thank you for your feedback. The question is in italics, and our response in bold text as below:

*I like the extensive reply that you gave to the reviewer. I just have a small question (maybe I missed something). But if I compare the equation (24) in the reply with equation (18) in the manuscript it seems that there is a difference of a factor 2. From a quick scan it seems to me that the factor 2 in (24) is not correct. Please can you shed some light on this issue?*

**Equation (14) in the manuscript is the analytic solution of the unsteady state salinity distribution, represented as:**

$$s = \bar{s}_0 \exp\left(\frac{Q_f a}{DA_0} \left(\exp\left(\frac{x}{a}\right) - 1\right)\right) \left(1 + \frac{E}{2a} \left(-\frac{Q_f a}{DA_0} \exp\left(\frac{x}{a}\right)\right) \sin(\omega t + \varphi)\right), \quad (14)$$

**where  $\bar{s}_0$  is the tide-averaged salinity at the mouth of estuary,  $D$  is the longitudinal dispersion coefficient,  $A_0$  is the cross-sectional area at the mouth,  $a$  is the convergence length of the cross-sectional area, and  $E$  is the tidal excursion. Since the tide-averaged salinity along the estuary can be obtained as:**

$$\bar{s}_x = \bar{s}_0 \exp\left(\frac{Q_f a}{DA_0} \left(\exp\left(\frac{x}{a}\right) - 1\right)\right), \quad (12)$$

**Equation (14) can be modified as:**

$$s = \bar{s}_x \left(1 + \left(-\frac{EQ_f}{2DA_0 \exp(-x/a)}\right) \sin(\omega t + \varphi)\right). \quad (S1)$$

**Introducing  $A=A_0 \exp(-x/a)$  into Equation (S1) yields:**

$$s = \bar{s}_x + \bar{s}_x \times \left(-\frac{EQ_f}{2DA}\right) \sin(\omega t + \varphi) = \bar{s}_x + \bar{s}_x \times I_s \sin(\omega t + \varphi), \quad (S2)$$

**where  $I_s = -EQ_f/(2DA)$  was defined as the salinity amplitude coefficient, i.e. Equation (24) in the reply. Therefore, the factor 2 in Equation (24) is correct. In addition, since the maximum salinity is reached at HWS and the minimum salinity is reached at LWS, Equation (S2) can be simplified for HWS into:**

$$s_{\max} = \bar{s}_x + \bar{s}_x \times \left(-\frac{EQ_f}{2DA}\right), \quad (S3)$$

**and for LWS into:**

$$s_{\min} = \bar{s}_x + \bar{s}_x \times \frac{EQ_f}{2DA}. \quad (S4)$$

**Thus combination of Equations (S3) and (S4) yields:**

$$\frac{s_{\max} - s_{\min}}{2} = \bar{s}_x \times \left( -\frac{EQ_f}{2DA} \right). \quad (\text{S5})$$

**Rearrangement of Equation (S5) and using  $x=0$  leads to the expression for the tidal excursion at the mouth,  $E_0$ :**

$$E_0 = \frac{(s_{\max 0} - s_{\min 0})DA_0}{\bar{s}_0(-Q_f)}, \quad (\text{S6})$$

**where  $s_{\max 0}$  is the maximum salinity at the estuary mouth and  $s_{\min 0}$  is the minimum salinity at the estuary mouth. Since the tidal excursion is assumed to decrease exponentially along the channel:**

$$E = E_0 \exp(-x/e), \quad (\text{17})$$

**we can obtain Equation (18) in the manuscript by substitution of Equation (S6) in Equation (17):**

$$E = \frac{(s_{\max 0} - s_{\min 0})DA_0}{\bar{s}_0(-Q_f)} \exp(-x/e) = \frac{a(s_{\max 0} - s_{\min 0})}{\bar{s}_0 \left( -\frac{aQ_f}{DA_0} \right)} \exp(-x/e). \quad (\text{18})$$

**Therefore, there is no factor 2 in Equation (18) in the manuscript.**

Best regards,

Yanwen Xu, on behalf of all authors.
